# Supplementary material
Source: PubMed Central journal article supplement (PMC9166935)

# Figure 1

Images show the whole blot, total ex vivo expanded hematopoietic cells were used.

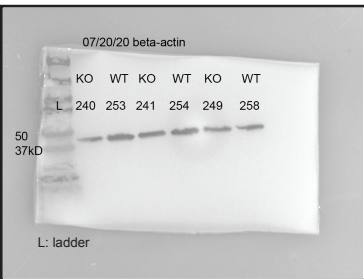

anti-beta actin, sigma, AC-74  
anti-H3.3, millipore, 09-938  
anti-H3, abcam, ab1791

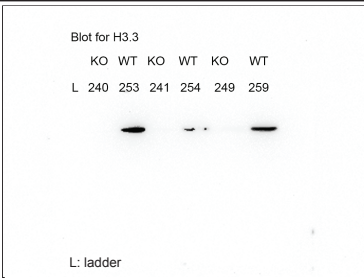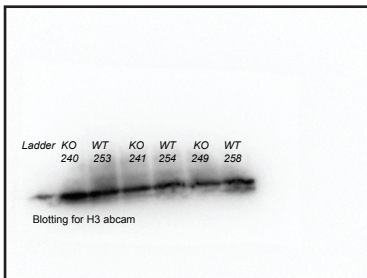

Supplement: NIHMS1797080-supplement-Source_Data_Extended_Data_Figure__9.pdf [file NIHMS1797080-supplement-Source_Data_Extended_Data_Figure__9.pdf]
