# Supplementary material
Source: PubMed Central journal article supplement (PMC9166935)

Extended data figure 1d

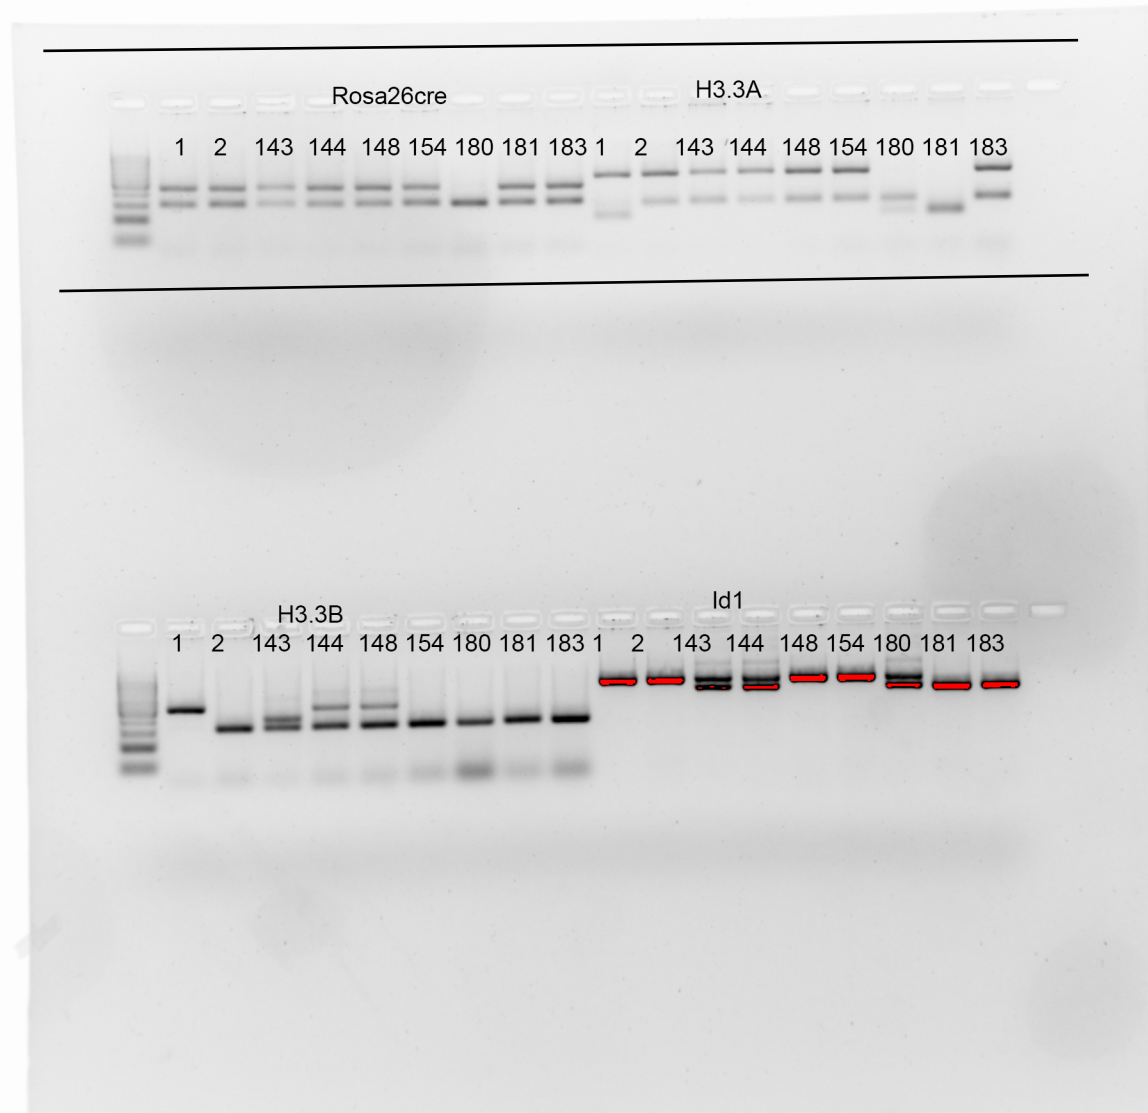

H3.3B

523 524 525 526 527 528 529 530 531 532 533 534 535 536 537 538 539 540 541 542 543 544 545 546 547 548 549 550 551

H3.3B

552 553 554 555 556 557 558 559 560 561 562 563 564 565 566 567 589 590 591 592 593 594 595 596

1 2 3 4 5 6 7

Extended data figure 1e

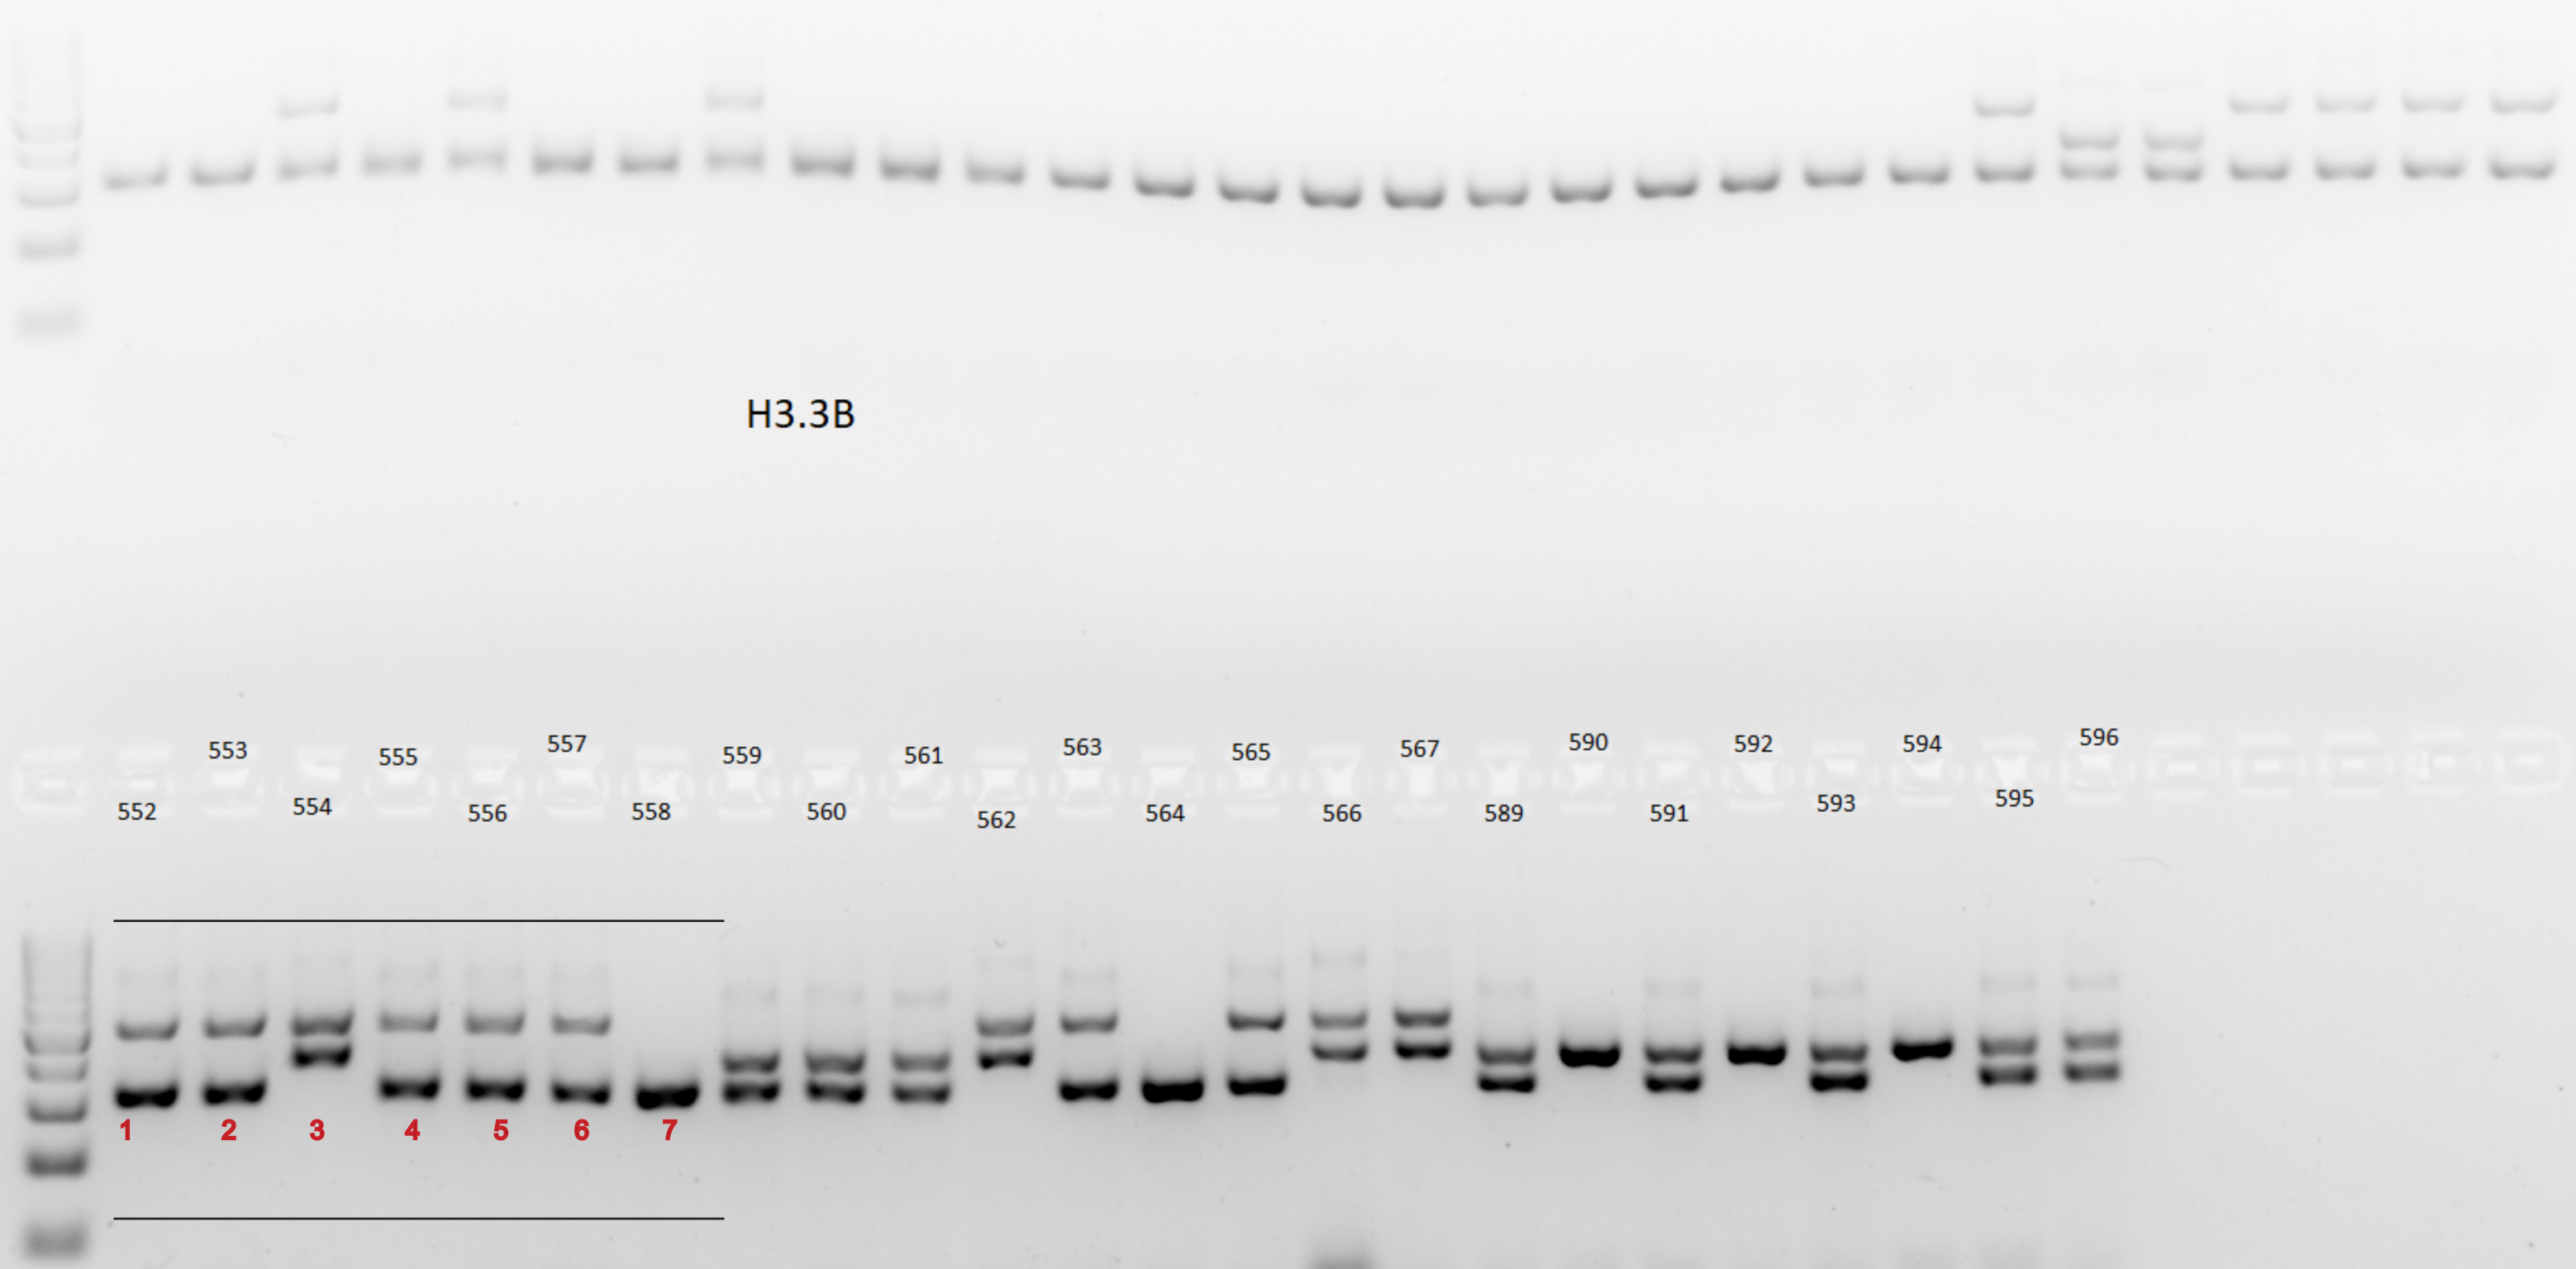

Supplement: NIHMS1797080-supplement-Source_Data_Extended_Data_Figure__1.pdf [file NIHMS1797080-supplement-Source_Data_Extended_Data_Figure__1.pdf]
